# Supplementary material for: Effects of 3‐Bromo‐4,5‐dihydroisoxazole Derivatives on Nrf2 Activation and Heme Oxygenase‐1 Expression
Source: PubMed Central journal article supplement — ChemistryOpen. 2018 Oct 12;7(11):858–64. doi: 10.1002/open.201800185 (PMC6207109; doi:10.1002/open.201800185), 2018-10-12
Supplement: OPEN-7-858-s001.pdf [file OPEN-7-858-s001.pdf]

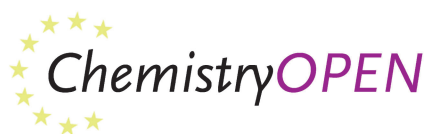

## Supporting Information

© 2018 The Authors. Published by Wiley-VCH Verlag GmbH & Co. KGaA, Weinheim

### **Effects of 3-Bromo-4,5-dihydroisoxazole Derivatives on Nrf2 Activation and Heme Oxygenase-1 Expression**

Andrea Pinto,<sup>[a]</sup> Zeina El Ali,<sup>[b, c]</sup> Sébastien Moniot,<sup>[d]</sup> Lucia Tamborini,<sup>\*,[e]</sup>  
Clemens Steegborn,<sup>[d]</sup> Roberta Foresti,<sup>[b, c]</sup> and Carlo De Micheli<sup>[e]</sup>

open\_201800185\_sm\_miscellaneous\_information.pdf

# SUPPORTING INFORMATION

## Table of contents:

1. Supplementary Figure 1

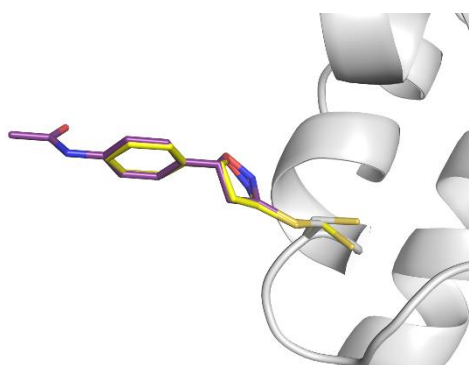

**Suppl. Figure S1:** Superposition of the crystal structure Keap1-BTB/**5** (purple) with a model of a complex between Keap1-BTB and **1** (yellow). The model with **1** was produced by modifying the crystal structure obtained with **5** (deletion of the *N*-acetyl substituent) and a subsequent energy minimization with *phenix.refine* (50 cycles each with 5000 steps). The resulting model was superposed to the experimental model.
